# Supplementary material for: Ongoing transmission of lymphatic filariasis in Samoa 4.5 years after one round of triple-drug mass drug administration
Source: PubMed Central journal article supplement (PMC11210818; doi:10.1371/journal.pntd.0012236), 2024-06-27
Supplement: pntd.0012236.s001.pdf [file pntd.0012236.s001.pdf]

# Ongoing transmission of lymphatic filariasis in Samoa 4.5 years after one round of triple-drug mass drug administration

Helen J Mayfield, Benn Sartorius, Sarah Sheridan, Maddison Howlett, Beatris Mario Martin,  
Robert Thomsen, Rossana Tofaeono-Pifeleti, Satupaitea Viali, Patricia M. Graves, Colleen L Lau

## Supplementary S1

$$\text{Lower bound} = (\hat{p}_1 - \hat{p}_2) - z_{\alpha/2} \sqrt{\frac{\hat{p}_1(1 - \hat{p}_1)}{n_1} + \frac{\hat{p}_2(1 - \hat{p}_2)}{n_2}}$$
$$\text{upper bound} = (\hat{p}_1 - \hat{p}_2) + z_{\alpha/2} \sqrt{\frac{\hat{p}_1(1 - \hat{p}_1)}{n_1} + \frac{\hat{p}_2(1 - \hat{p}_2)}{n_2}}$$

**S1 Fig** Standard formulae used to calculate the lower and upper bounds for the delta (difference of two proportions). Used to calculate the 95% confidence intervals for the delta change from 2018 to 2023 and from 2019 to 2023 for Ag prevalence, Mf Prevalence and the proportion of Ag-positive participants who were also Mf-positive. **Reference:** Newcombe, R.G., Interval Estimation for the Difference Between Independent Proportions: Comparison of Eleven Methods. *Statistics in Medicine*, 1998. 17: p. 873–890.
