# Supplementary material for: Ongoing transmission of lymphatic filariasis in Samoa 4.5 years after one round of triple-drug mass drug administration
Source: PubMed Central journal article supplement (PMC11210818; doi:10.1371/journal.pntd.0012236), 2024-06-27
Supplement: pntd.0012236.s002.pdf [file pntd.0012236.s002.pdf]

# Ongoing transmission of lymphatic filariasis in Samoa 4.5 years after one round of triple-drug mass drug administration

Helen J Mayfield, Benn Sartorius, Sarah Sheridan, Maddison Howlett, Beatris Mario Martin, Robert Thomsen, Rossana Tofaeono-Pifeleti, Satupaitea Viali, Patricia M Graves, Colleen L Lau

## Supplementary S1 Table

**S1 Table** Participant numbers and demographic details for 2018, 2019 and 2023 surveys in eight sentinel primary sampling units (PSUs) in Samoa.

| PSU                   | 2018               |                    |                    |                      |            | 2019               |                    |                    |                      |            | 2023               |                    |                    |                      |            |
|-----------------------|--------------------|--------------------|--------------------|----------------------|------------|--------------------|--------------------|--------------------|----------------------|------------|--------------------|--------------------|--------------------|----------------------|------------|
|                       | Total participants | Males (%)          | Females (%)        | Median age (min-max) | Houses     | Total participants | Males (%)          | Females (%)        | Median age (min-max) | Houses     | Total participants | Males (%)          | Females (%)        | Median age (min-max) | Houses     |
| <b>Total</b>          | <b>558</b>         | <b>275 (49.3%)</b> | <b>283 (50.7%)</b> | <b>24 (5-89)</b>     | <b>104</b> | <b>643</b>         | <b>291 (45.3%)</b> | <b>352 (54.7%)</b> | <b>20 (5-80)</b>     | <b>121</b> | <b>623</b>         | <b>280 (44.9%)</b> | <b>343 (55.1%)</b> | <b>22 (5-93)</b>     | <b>125</b> |
| Vaivase Tai           | 60                 | 35 (58.3%)         | 25 (41.7%)         | 25 (5-87)            | 9          | 58                 | 29 (50.0%)         | 29 (50.0%)         | 24 (5-75)            | 15         | 61                 | 30 (49.2%)         | 31 (50.8%)         | 29 (5-91)            | 15         |
| Mutiatele + Saleaamua | 71                 | 36 (50.7%)         | 35 (49.3%)         | 26 (5-70)            | 14         | 89                 | 36 (40.4%)         | 53 (59.6%)         | 16 (5-78)            | 19         | 68                 | 26 (38.2%)         | 42 (61.8%)         | 25 (5-77)            | 18         |
| Tuanai                | 69                 | 33 (47.8%)         | 36 (52.2%)         | 24 (5-79)            | 16         | 76                 | 42 (55.3%)         | 34 (44.7%)         | 23 (5-75)            | 18         | 72                 | 36 (50.0%)         | 36 (50.0%)         | 25 (5-93)            | 15         |
| Fusi                  | 68                 | 31 (45.6%)         | 37 (54.4%)         | 29 (5-86)            | 14         | 69                 | 25 (36.2%)         | 44 (63.8%)         | 21 (5-74)            | 12         | 91                 | 46 (50.5%)         | 45 (49.5%)         | 17 (5-84)            | 15         |
| Vaiusu                | 68                 | 40 (58.8%)         | 28 (41.2%)         | 27 (5-75)            | 12         | 100                | 43 (43.0%)         | 57 (57.0%)         | 23 (5-77)            | 15         | 101                | 44 (43.6%)         | 56 (56.4%)         | 17 (5-78)            | 16         |
| Falefa                | 80                 | 39 (48.8%)         | 41 (51.2%)         | 21 (5-89)            | 12         | 74                 | 27 (36.5%)         | 47 (63.5%)         | 18 (5-77)            | 12         | 58                 | 23 (39.7%)         | 35 (60.3%)         | 20 (5-65)            | 15         |
| Faleasiu              | 70                 | 28 (40.0%)         | 42 (60.0%)         | 18 (5-72)            | 15         | 102                | 52 (51.0%)         | 50 (49.0%)         | 16 (5-79)            | 15         | 72                 | 29 (40.3%)         | 43 (59.7%)         | 25 (5-87)            | 16         |
| Lauli'i               | 72                 | 33 (45.8%)         | 39 (54.2%)         | 23 (5-81)            | 12         | 75                 | 37 (49.3%)         | 38 (50.7%)         | 25 (5-80)            | 15         | 100                | 46 (46.0%)         | 54 (54.0%)         | 26 (5-73)            | 15         |
